# Supplementary material
Source: Springer Nature journal article supplement (https://www.springermedizin.de/resource/supplementary/12913_2013_3185_MOESM1_ESM.pdf/9532644)

## Reasons for defaulting ART

reasons

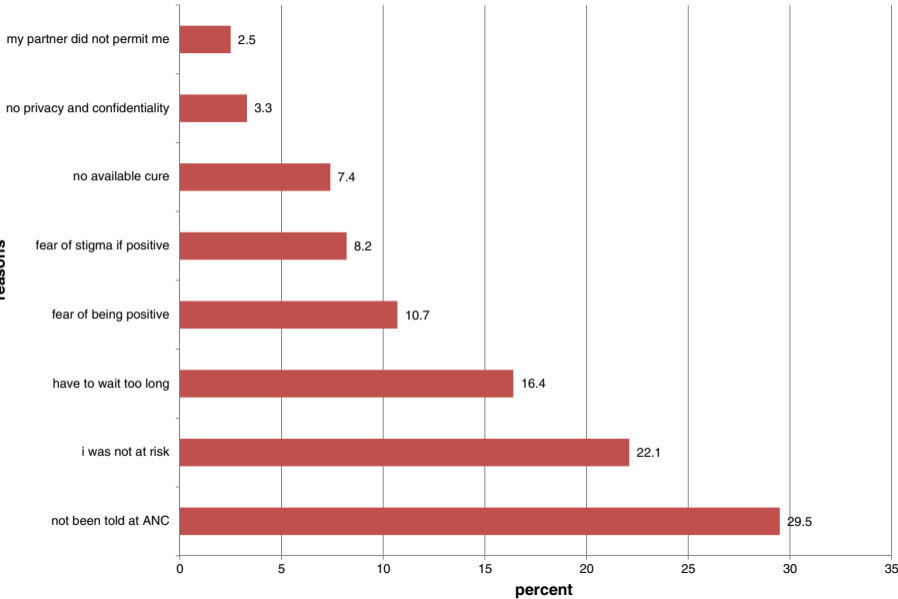

Supplement: MOESM1 [file 9532644]
